1 **AMON: Annotation of metabolite origins via networks to better integrate microbiome and**  
2 **metabolome data**

3

4 **Shaffer, M. Department of Medicine, University of Colorado Denver, Aurora, CO, USA 80045**

5 **Quinn, K. Skaggs School of Pharmacy and Pharmaceutical Sciences, University of Colorado Denver, Aurora,**  
6 **CO USA 80045**

7 **Doenges, K. Skaggs School of Pharmacy and Pharmaceutical Sciences, University of Colorado Denver,**  
8 **Aurora, CO USA 80045**

9 **Zhang, X. Skaggs School of Pharmacy and Pharmaceutical Sciences, University of Colorado Denver, Aurora,**  
10 **CO USA 80045<sup>†</sup>**

11 **Bokatjian, S. Skaggs School of Pharmacy and Pharmaceutical Sciences, University of Colorado Denver,**  
12 **Aurora, CO USA 80045**

13 **Reisdorph, N. Skaggs School of Pharmacy and Pharmaceutical Sciences, University of Colorado Denver,**  
14 **Aurora, CO USA 80045**

15 **Lozupone, CA\*. Department of Medicine, University of Colorado Denver, Aurora, CO, USA 80045**

16 *\*To whom correspondence should be addressed*

17 *<sup>†</sup>Current affiliation BioElectron Technology Corporation, Mountain View, CA, 94043*

18

19 **Running head: AMON: Annotation of metabolite origins via networks**

20 **ABSTRACT**

21 *Motivation:* Untargeted metabolomics of host-associated samples has yielded insights into  
22 mechanisms by which microbes modulate health. However, data interpretation is challenged by  
23 the complexity of origins of the small molecules measured, which can come from the host,  
24 microbes that live with the host, or from other exposures such as diet or the environment.

25 *Results:* We address this challenge through development of AMON: Annotation of Metabolite  
26 Origins via Networks. AMON is an open-source bioinformatics application that can be used to  
27 determine the degree to which annotated compounds in the metabolome may have been  
28 produced by bacteria present, the host, either (i.e. both the bacteria and host are capable of  
29 production), or neither (i.e. neither the human or the fecal microbiome are predicted to be  
30 capable of producing the observed metabolite).

31 *Availability and Implementation:* This software is available at  
32 <https://github.com/lozuponelab/AMON> as well as via pip.

33 *Contact:* catherine.lozupone@ucdenver.edu

34

35

## 36 INTRODUCTION

37 The host-associated microbiome can influence many aspects of human health and disease  
38 through its metabolic activity. Examples include microbe-host co-metabolism of dietary  
39 choline/carnitine to TMAO as a driver of heart disease (Wang *et al.*, 2011), microbial production  
40 of branched chain amino acids as a contributor to insulin resistance (Pedersen *et al.*, 2016), and  
41 microbial production of 12,13-DiHOME as a driver of CD4<sup>+</sup> T cell dysfunction associated with  
42 childhood atopy (Fujimura *et al.*, 2016). A key way of exploring which compounds might  
43 mediate relationships between microbial activity and host disease is untargeted metabolomics  
44 (e.g. mass spectrometry) of host materials such as stool, plasma, urine, or tissues. These analyses  
45 result in the detection and relative quantitation of hundreds to thousands of compounds, the sum  
46 of which is referred to as a “metabolome”. Host-associated metabolomes represent a complex  
47 milieu of compounds that can have different origins, including the diet of the host organism and  
48 a variety of environmental exposures such as pollutants. In addition, the metabolome contains  
49 metabolic products of these compounds, i.e. metabolites, that can result from host and/or  
50 microbiome metabolism or co-metabolism (Shaffer *et al.*, 2017).

51 One way to estimate which metabolites in host samples originate from host versus microbial  
52 metabolism is to use metabolic networks described in databases such as KEGG (Kanehisa *et al.*,  
53 2017). These networks capture the relationship between metabolites, the enzymes that produce  
54 them, and the genomes of organisms (both host and microbial) that contain genes encoding those  
55 enzymes. These networks provide a framework for relating the genes present in the host and  
56 colonizing bacteria, and the metabolites present in a sample.

57 Here we present AMON, which uses information in KEGG to predict whether measured  
58 metabolites are likely to originate from singular organisms or collections of organisms based on

59 a list of the genes that they encode. As an example, AMON can be used to predict whether  
60 metabolites may originate from the host itself versus from host-associated microbiomes as  
61 assessed with 16S ribosomal RNA (rRNA) gene sequences or shotgun metagenomics. We  
62 demonstrate our tool by applying it to a dataset from a cohort of HIV positive individuals and  
63 controls in which the stool microbiome was assessed with 16S rRNA gene sequencing and the  
64 plasma metabolome was assessed with untargeted liquid chromatography mass spectrometry  
65 (LC/MS). We also illustrate how much information is lost when we only focus on compounds  
66 and genes of known identity/function, emphasizing the need for complimentary approaches to  
67 general metabolomic database searches for the identification of microbially produced  
68 compounds.

69

## 70 **METHODS**

### 71 **AMON**

72 AMON (Annotation of Metabolite Origins via Networks) is a command line tool for  
73 predicting which compounds are produced by microbes and which are produced by the host that  
74 is available at <https://github.com/lozuponelab/AMON>. The basis of this method is in multi-  
75 organism metabolic networks as depicted in Figure 1A. This is a directional network with a flow  
76 starting from nodes representing the organisms present in a community and edges connecting to  
77 the genes in the organism's genomes. These genes connect to the chemical reactions that the  
78 proteins that they encode perform, which connect to the compounds that those reactions consume  
79 (incoming edges) and produce (outgoing edges). We trace up this network from compound to  
80 organism to determine the possible origin of a metabolite. For example, in Figure 1A, we can  
81 infer that the microbiome could have generated compound 9 because of the presence of gene 4 in

82 the genome of Bacteria 2. However, compound 9 could also have been produced by the host  
83 because of the presence of gene 5 in the human genome. In contrast, compound 8 could only be  
84 produced by the bacteria present and not the host.

85 AMON takes as input lists of KEGG KO (KEGG Orthology) identifiers that are predicted to  
86 be present in different potential sources (e.g. the metagenome of a host-associated microbiome or  
87 the genome of host organism) and a list of KEGG compound IDs, such as from an annotated  
88 metabolome (Figure 1B). AMON uses the multi-organism metabolic network constructed with  
89 information in KEGG to produce a table indicating which compounds (from the entire set of  
90 KEGG compounds and from the list of those annotated to be present in the metabolome) could  
91 be produced by each of the different provided KO sets and a file for input to KEGG mapper  
92 (<https://www.genome.jp/kegg/mapper.html>) which can be used to overlay this information on  
93 KEGG pathway diagrams. AMON uses the hypergeometric test to measure enrichment of KEGG  
94 pathways in metabolites predicted to originate specifically from each source environment that are  
95 present in the metabolome. Specifically, the set of metabolites predicted to be produced by the  
96 list of KO identifiers provided by the user is tested for enrichment of metabolites present in  
97 KEGG pathways relative to the background set of all compounds in all KEGG pathways that had  
98 at least one metabolite predicted to be produced by the provided gene sets. It produces a  
99 summary figure (Venn diagram) illustrating predicted metabolite origins.

100 AMON is built to be flexible as to the type of technology and informatics methods used to  
101 obtain the list of KOs present in each source sample and compounds present in a metabolome.  
102 As shown in our Case Study below, 16S rRNA data can be used to predict the KO list using  
103 PICRUSt (Langille *et al.*, 2013), which uses whole genome sequence information to predict KOs  
104 present. Other ways to produce this list of KOs include annotation of genes present in a shotgun

105 metagenome, e.g. using tools such as HUMAnN (Abubucker *et al.*, 2012). The host KOs can be  
106 acquired from KEGG using the `extract_ko_genome_from_organism.py` script, which downloads  
107 the KOs from the KEGG API or parses them from a KEGG FTP file and makes a list of KOs  
108 present in that file.

109 AMON does not require the user to purchase a KEGG license. For individuals who have  
110 purchased a KEGG license, files containing KO and reaction information provided by KEGG  
111 can be loaded into AMON. As another option, AMON can also download the required  
112 information using the publicly available KEGG API (<https://www.kegg.jp/kegg/rest/>), although  
113 this method is comparatively slow and limits maximum dataset size based on the limits of the  
114 KEGG API.

## 115 **Case Study**

116 We used AMON to relate the stool microbiome (as assessed with 16S rRNA gene  
117 sequencing) to the plasma metabolome (as assessed with untargeted LC/MS), in a cohort of HIV  
118 positive individuals (n=37) and HIV-negative controls (n=22). These data represent a subset of  
119 the cohort described in (Armstrong *et al.*, 2018) and are paired with metabolome data as a part of  
120 a study described at ClinicalTrials.gov (Identifier: NCT02258685). The overall goal of our case  
121 study was to use AMON to determine the degree to which annotated compounds in the plasma  
122 metabolome of our study cohort may have been produced by bacteria present in fecal samples,  
123 the host, either (i.e. both are capable of production), or neither (i.e. neither the human or the fecal  
124 microbiome are predicted to be capable of producing the observed metabolite).

125 All study participants were recruited from University of Colorado Hospital with an approved  
126 IRB protocol (CoMIRB 14-1595). Stool samples from 59 individuals were collected at home in a  
127 commode specimen collector within 24 hours of the clinic visit in which blood was drawn. Stool

128 samples were stored at -20°C during transit and at -80°C prior to DNA extraction with the  
129 MoBIO kit and preparation for barcoding sequencing using the Earth Microbiome Project  
130 protocol (<http://www.earthmicrobiome.org/protocols-and-standards/16s/>). The 16S rRNA gene  
131 V4 region of stool microbes was sequenced using MiSeq (Illumina), denoised using DADA2  
132 (Callahan *et al.*, 2016) and binned into 99% Operational Taxonomic Units (OTUs) using  
133 UCLUST (Edgar, 2010) and the greengenes database (version 13\_8) via QIIME 1.9.1 (Caporaso  
134 *et al.*, 2010). We used PICRUSSt (Langille *et al.*, 2013) to predict a metagenome and AMON to  
135 predict metabolites.

### 136 **Plasma Sample Preparation:**

137 A modified liquid-liquid extraction protocol was used to extract hydrophobic and hydrophilic  
138 compounds from the plasma samples (Yang *et al.*, 2013). Briefly, 100 µL of plasma spiked with  
139 internal standards underwent a protein crash with 400 µL ice cold methanol. The supernatant  
140 was dried under nitrogen and methyl *tert*-butyl ether (MTBE) and water were added to extract  
141 the hydrophobic and hydrophilic compounds, respectively. The upper hydrophobic layer was  
142 transferred to a new tube and the lower hydrophilic layer was re-extracted with MTBE. The  
143 upper hydrophobic layer was combined, dried under nitrogen and reconstituted in 200 µL of  
144 methanol. The hydrophilic layer was dried under nitrogen, underwent a second protein crash  
145 with water and ice-cold methanol (1:4 water-methanol). The supernatant was removed, dried by  
146 SpeedVac at 45 °C and reconstituted in 100 µL of 5% acetonitrile in water. Both fractions were  
147 stored at -80 °C until LCMS analysis.

### 148 **Liquid Chromatography Mass Spectrometry**

149 The hydrophobic fractions were analyzed using reverse phase chromatography on an Agilent  
150 Technologies (Santa Clara, CA) 1290 ultra-high precision liquid chromatography (UHPLC)

151 system on an Agilent Zorbax Rapid Resolution HD SB-C18, 1.8 $\mu$ m (2.1 x 100mm) analytical  
152 column with an Agilent Zorbax SB-C18, 1.8 micron (2.1 x 5 mm) guard column. The  
153 hydrophilic fractions were analyzed using hydrophilic interaction liquid chromatography  
154 (HILIC) on a 1290 UHPLC system using a Phenomenex Kinetex HILIC, 2.6 $\mu$ m (2.1 x 50mm)  
155 analytical column with an Agilent Zorbax Eclipse Plus C8 5 $\mu$ m (2.1 x12.5mm) guard column.  
156 The hydrophobic and hydrophilic fractions were run on Agilent Technologies (Santa Clara, CA)  
157 6520 and 6550 Quadrupole Time of Flight (QTOF) mass spectrometers, respectively. Both  
158 fractions were run in positive and negative electrospray ionization (ESI) modes, as previously  
159 described (Heischmann *et al.*, 2016).

#### 160 **Mass Spectrometry Data Processing**

161 Compound data was extracted using Agilent Technologies (Santa Clara, CA) Mass Hunter  
162 Profinder Version B.08 (Profinder) software in combination with Agilent Technologies Mass  
163 Profiler Professional Version 14 (MPP) as described previously (Heischmann *et al.*, 2016).  
164 Briefly, a naive feature finding algorithm, Find By Molecular Feature, was used in Profinder to  
165 extract compound data from all samples and sample preparation blanks. To reduce the presence  
166 of missing values, a theoretical mass and retention time database was generated for compounds  
167 present in samples only. This database was then used to re-search the raw sample data in  
168 Profinder using the Find By Ion algorithm.

169 An in-house database containing METLIN, Lipid Maps, KEGG, and HMDB spectral data  
170 was used to putatively annotate metabolites based on exact mass, isotope ratios and isotopic  
171 distribution with a mass error cutoff of 10 ppm. This corresponds to a Metabolomics Standards  
172 Initiative metabolite identification level 2 (Sumner *et al.*, 2007).

173



## 174 **RESULTS**

175 We used PICRUSt to determine the genome content of the OTUs detected in the fecal  
176 samples. PICRUSt drops from the analysis OTUs that do not have related reference sequences in  
177 the database and produces an estimate of the nearest sequenced taxon index (NSTI) which  
178 measures how close those sequences are to sequenced genomes (those more closely related to  
179 genomes have more power to make predictions regarding gene content). Since human gut  
180 bacteria are well represented in genome databases, only 0.7% of total reads of the detected  
181 sequences were dropped on account of not having a related reference sequence in the database.  
182 Furthermore, the average NSTI across samples was 0.08, indicating that most OTUs were highly  
183 related to an organism with a sequenced genome. We applied PICRUSt to the 16S rRNA dataset  
184 with only OTUs present in more than 11 of 59 samples included. The 267 remaining OTUs were  
185 predicted to contain 4,409 unique KOs using PICRUSt. We used the KEGG list of KOs in the  
186 human genome to represent human gene content.

187 We provided these lists of gut microbiome and human KOs to AMON to produce a list of  
188 compounds generated from the gut microbiome and the human genome. Of the 4,409 unique  
189 KOs that PICRUSt predicted to be present in the gut microbiome, only 1,476 (33.5%) had an  
190 associated reaction in KEGG. Those without associated reactions may represent orthologous  
191 gene groups that do not perform metabolic reactions (such as transporters), or that are known to  
192 exist but for which the exact reaction is unknown, showing gaps in our knowledge (Fig 2A).  
193 Using information in KEGG, AMON predicted these KOs to produce 1,321 unique compounds  
194 via 1,926 unique reactions. The human genome was predicted to produce 1,376 metabolites via  
195 1,809 reactions.

196 Our metabolomics assays detected 5,971 compounds, of which only 1,018 (17%) could be  
197 putatively annotated with KEGG compound identifiers via a database search; only 471 (6%) of  
198 the 5,971 detected compounds were associated with a reaction in KEGG (Supplemental Table 1).  
199 Of these 471 annotated compounds in the plasma metabolome with associated KEGG reactions,  
200 189 were predicted to be produced by enzymes in either human or stool bacterial genomes. 40  
201 compounds were exclusively produced by bacteria, 58 exclusively by the host, and 91 by either  
202 human or bacterial enzymes (Fig 2B). The remaining 282 compounds may be 1) from the  
203 environment, 2) produced by microbes in other body sites or 3) host or gut microbial products  
204 from unannotated genes (Supplemental Table 1).

205 We used AMON to assess enrichment of pathways in the detected human and bacterial  
206 metabolites using the hypergeometric test (Figure 3A; Supplemental table 2). The 41 compounds  
207 predicted to be produced by stool bacteria and not the host were enriched in xenobiotic  
208 degradation pathways, including nitrotoluene and atrazine degradation, and pathways for amino  
209 acids metabolism, including the phenylalanine, tyrosine and tryptophan biosynthesis pathway  
210 and the cysteine and methionine metabolism pathway. The metabolite origin data was visualized  
211 using KEGG mapper for the phenylalanine, tyrosine and tryptophan biosynthesis pathway  
212 (Figure 3B). This tool helps to visualize the host-microbe co-metabolism and which genes are  
213 important for compounds that may have come from multiple sources. For instance, Figure 3B  
214 allows us to see that Indole is a compound found in our metabolome that could only have been  
215 produced by bacterial metabolism via the highlighted enzyme (K01695, tryptophan synthase).  
216 Also, Tyrosine is a compound found in our metabolome that could have been synthesized by a  
217 variety of enzymes found only in bacteria, only in humans, or in both and so further exploration  
218 would be needed to understand origins of this compound. The 51 compounds which were

219 detected and predicted to be produced by the human genome were enriched in pathways that  
220 include bile secretion, steroid hormone biosynthesis and gastric acid secretion.

221

## 222 **DISCUSSION**

223 Taken together, these analyses show that AMON can be used to predict the origin of  
224 compounds detected in a complex metabolome, such as stool. Our case study shows the specific  
225 application of predicting origins of plasma compounds as being from the fecal microbiome  
226 versus the host. However, this tool can be used to compare any number of different sources – e.g.  
227 from the microbiomes of different body sites or compounds that may come directly from plants  
228 consumed in the diet. Also, the outputs of AMON can be used in conjunction with lists of  
229 metabolites that were determined to significantly differ with disease state or correlate with other  
230 host phenotypes to predict origins of metabolites of interest.

231 Although our example uses PICRUSt to predict compounds of bacterial origin using 16S  
232 rRNA sequence data, AMON requires a list of KEGG Orthology identifiers as input and so could  
233 also be used with shotgun sequencing data. This can allow for a more thorough interrogation of  
234 host microbiomes that account for strain level variation in genome content and opens its  
235 application to environments with less understood genomes.

236 The pathway enrichment of compounds predicted to be unique to the gut microbiome and the  
237 host provide a level of validation for these results. The pathways enriched with compounds  
238 predicted to only be from microbes are consistent with known roles for gut bacteria in degrading  
239 various xenobiotics (Maurice *et al.*, 2013; Lu *et al.*, 2015; Das *et al.*, 2016; Saad *et al.*; Clayton  
240 *et al.*, 2009) and for influencing amino acid (Neis *et al.*, 2015; O'Mahony *et al.*, 2015) and  
241 vitamin metabolism (Streit and Entcheva, 2003). Likewise, the pathways enriched with

242 compounds predicted to be human only include host processes such as taste transduction and bile  
243 secretion. Further, since the microbial community measured was from the human gut and the  
244 metabolome came from plasma, these results suggest that these microbial metabolites can  
245 translocate from the gut into systemic circulation. This is consistent with the gut microbiome  
246 being linked with many diseases that occur outside of the gut. Examples include interactions  
247 between the gut and brain via microbially derived compounds such as serotonin (O'Mahony *et*  
248 *al.*, 2015), and branched chain amino acids from the gut microbiome as a contributor to insulin  
249 resistance (Pedersen *et al.*, 2016).

250       However, this analysis also highlights limitations in this approach due to issues with  
251 annotation of both metabolites and the enzymes that may produce them. Overall, it is striking  
252 that of 5,971 compounds in the LC/MS data, only 471 could be linked to enzymatic reactions in  
253 KEGG. For example the human genome is known to contain approximately 20,000 genes  
254 (Ezkurdia *et al.*, 2014); however, there are only 7286 KOs annotated in KEGG. These KOs only  
255 predict the creation of 1376 unique compounds while the Human Metabolome Database 4.0  
256 contains 114,100 (Wishart *et al.*, 2018). Part of this discrepancy is because multiple species of  
257 lipids are, generally, reduced to a single compound in KEGG. For example, while KEGG  
258 includes a single phosphatidylcholine (PC) lipid molecule in the Glycerophospholipid pathway,  
259 in fact, there are over 1,000 species of PCs. It is also important to note that metabolite  
260 annotations are based on peak masses and isotope ratios, which can often represent multiple  
261 compounds and/or in-source fragments; our confidence in the identity of these compounds is  
262 only moderate.

263       The situation is even worse for complex microbial communities, where even fewer genes are  
264 of known function. Because of these gaps in our knowledge of metabolite production, efforts to

265 identify microbially produced metabolites that affect disease should also use methods that are  
266 agnostic to these knowledge-bases. These include techniques such as 1) identifying highly  
267 correlated microbes and metabolites to identify potential productive/consumptive relationships  
268 that can be further validated 2) molecular networking approaches which take advantage of  
269 tandem mass spectroscopy data to annotate compounds based on similarity to known compounds  
270 with related MS/MS profiles (Watrous *et al.*, 2012) or 3) coupling LC/MS runs with data from  
271 germ-free versus colonized animals (Wang *et al.*, 2011; Rothhammer *et al.*, 2016; Hsiao *et al.*,  
272 2013) or antibiotic versus non-antibiotic treated humans (Tang *et al.*, 2013; Antunes *et al.*,  
273 2011). Because AMON takes only KO identifiers and can pull database information from the  
274 KEGG API or user provided KEGG files, it will become increasingly useful as KEGG improves  
275 as well as other parts of the annotation process.

276 Although our application is specifically designed to work with the KEGG database, similar  
277 logic could be used for other databases such as MetaCyc (Caspi *et al.*, 2014). Our tool also does  
278 not apply methods such as gap-filling (Thiele *et al.*, 2014; Orth and Palsson, 2010) and metabolic  
279 modeling (Orth *et al.*, 2010; Mendes-Soares and Chia, 2017) in its estimates. The goal is not to  
280 produce precise measurements of the contributions of the microbiome and host to the abundance  
281 of a metabolite. Rather, AMON is designed to annotate metabolomics results to give the user an  
282 understanding of whether specific metabolites could have been produced directly by the host or  
283 its microbiomes. If a metabolite is identified by AMON as being of microbial origin and is  
284 associated with a phenotype, this result should motivate the researcher to perform follow up  
285 studies. These can include confirming the identity of the metabolite, via methods such as tandem  
286 mass spectrometry, and performing experiments to confirm the ability of microbes of interest to  
287 produce the metabolite.

288 AMON also does not account for co-metabolism between the host and microbes. An example  
289 of this is the production of TMAO from dietary choline. Our tool would list TMAO as a host  
290 compound and its precursor TMA as a microbiome derived compound but would not indicate  
291 that TMAO could overall not be produced from dietary substrates unless a microbiome was  
292 present. Further inspection of metabolic networks may be needed to decipher these co-  
293 metabolism relationships.

294 When researchers are seeking to integrate microbiome and metabolome data, identifying the  
295 origin of metabolites measured is an obvious route. AMON facilitates the annotation of  
296 metabolomics data by tagging compounds with their potential origin, either as bacteria or host.  
297 This allows researchers to develop hypotheses about the metabolic involvement of microbes in  
298 disease.

299

## 300 **ACKNOWLEDGEMENTS**

301 This work was supported by National Institutes of Health R01 DK104047 and the associated  
302 metabolomics supplement by the National Institutes of Health Common fund and 4 T15  
303 LM009451-10. High performance computing was supported by a cluster at the University of  
304 Colorado Boulder funded by National Institutes of Health 1S10OD012300.

305

## 306 **REFERENCES**

307 Abubucker,S. *et al.* (2012) Metabolic Reconstruction for Metagenomic Data and Its Application  
308 to the Human Microbiome. *PLoS Comput. Biol.*, **8**, e1002358.  
309 Antunes,L.C.M. *et al.* (2011) Effect of antibiotic treatment on the intestinal metabolome.  
310 *Antimicrob. Agents Chemother.*, **55**, 1494–503.  
311 Armstrong,A.J. *et al.* (2018) An exploration of Prevotella-rich microbiomes in HIV and men  
312 who have sex with men. *bioRxiv*, 424291.  
313 Callahan,B.J. *et al.* (2016) DADA2: High-resolution sample inference from Illumina amplicon  
314 data. *Nat. Methods*, **13**, 581–583.

- 315 Caporaso, J.G. *et al.* (2010) QIIME allows analysis of high-throughput community sequencing  
316 data. *Nat. Methods*, **7**, 335–336.
- 317 Caspi, R. *et al.* (2014) The MetaCyc database of metabolic pathways and enzymes and the  
318 BioCyc collection of Pathway/Genome Databases. *Nucleic Acids Res.*, **42**, D459–D471.
- 319 Clayton, T.A. *et al.* (2009) Pharmacometabonomic identification of a significant host-  
320 microbiome metabolic interaction affecting human drug metabolism. *Proc. Natl. Acad. Sci.*  
321 *U. S. A.*, **106**, 14728–14733.
- 322 Das, A. *et al.* (2016) Xenobiotic Metabolism and Gut Microbiomes. *PLoS One*, **11**, e0163099.
- 323 Edgar, R.C. (2010) Search and clustering orders of magnitude faster than BLAST.  
324 *Bioinformatics*, **26**, 2460–2461.
- 325 Ezkurdia, I. *et al.* (2014) Multiple evidence strands suggest that there may be as few as 19 000  
326 human protein-coding genes. *Hum. Mol. Genet.*, **23**, 5866–5878.
- 327 Fujimura, K.E. *et al.* (2016) Neonatal gut microbiota associates with childhood multisensitized  
328 atopy and T cell differentiation. *Nat. Med.*, **22**, 1187–1191.
- 329 Heischmann, S. *et al.* (2016) Exploratory Metabolomics Profiling in the Kainic Acid Rat Model  
330 Reveals Depletion of 25-Hydroxyvitamin D3 during Epileptogenesis. *Sci. Rep.*, **6**, 31424.
- 331 Hsiao, E.Y. *et al.* (2013) Microbiota Modulate Behavioral and Physiological Abnormalities  
332 Associated with Neurodevelopmental Disorders. *Cell*, **155**, 1451–1463.
- 333 Kanehisa, M. *et al.* (2017) KEGG: new perspectives on genomes, pathways, diseases and drugs.  
334 *Nucleic Acids Res.*, **45**, D353–D361.
- 335 Langille, M.G.I. *et al.* (2013) Predictive functional profiling of microbial communities using 16S  
336 rRNA marker gene sequences. *Nat Biotech*, **31**, 814–821.
- 337 Lu, K. *et al.* (2015) Xenobiotics: Interaction with the Intestinal Microflora. *ILAR J.*, **56**, 218–227.
- 338 Maurice, C.F.F. *et al.* (2013) Xenobiotics Shape the Physiology and Gene Expression of the  
339 Active Human Gut Microbiome. *Cell*, **152**, 39–50.
- 340 Mendes-Soares, H. and Chia, N. (2017) Community metabolic modeling approaches to  
341 understanding the gut microbiome: Bridging biochemistry and ecology. *Free Radic. Biol.*  
342 *Med.*, **105**, 102–109.
- 343 Neis, E. *et al.* (2015) The Role of Microbial Amino Acid Metabolism in Host Metabolism.  
344 *Nutrients*, **7**, 2930–2946.
- 345 O'Mahony, S.M. *et al.* (2015) Serotonin, tryptophan metabolism and the brain-gut-microbiome  
346 axis. *Behav. Brain Res.*, **277**, 32–48.
- 347 Orth, J.D. *et al.* (2010) What is flux balance analysis? *Nat. Biotechnol.*, **28**, 245–8.
- 348 Orth, J.D. and Palsson, B.Ø. (2010) Systematizing the generation of missing metabolic  
349 knowledge. *Biotechnol. Bioeng.*, **107**, 403–412.
- 350 Pedersen, H.K. *et al.* (2016) Human gut microbes impact host serum metabolome and insulin  
351 sensitivity. *Nature*, **535**, 376–381.
- 352 Rothhammer, V. *et al.* (2016) Type I interferons and microbial metabolites of tryptophan  
353 modulate astrocyte activity and central nervous system inflammation via the aryl  
354 hydrocarbon receptor. *Nat. Med.*, **22**, 586.
- 355 Saad, R. *et al.* Gut Pharmacomicrobiomics: the tip of an iceberg of complex interactions between  
356 drugs and gut-associated microbes.
- 357 Shaffer, M. *et al.* (2017) Microbiome and metabolome data integration provides insight into  
358 health and disease. *Transl. Res.*, **189**, 51–64.
- 359 Streit, W.R. and Entcheva, P. (2003) Biotin in microbes, the genes involved in its biosynthesis, its  
360 biochemical role and perspectives for biotechnological production. *Appl. Microbiol.*



- 361 *Biotechnol.*, **61**, 21–31.
- 362 Sumner,L.W. *et al.* (2007) Proposed minimum reporting standards for chemical analysis  
363 Chemical Analysis Working Group (CAWG) Metabolomics Standards Initiative (MSI).  
364 *Metabolomics*, **3**, 211–221.
- 365 Tang,W.H.W. *et al.* (2013) Intestinal Microbial Metabolism of Phosphatidylcholine and  
366 Cardiovascular Risk. *N. Engl. J. Med.*, **368**, 1575–1584.
- 367 Thiele,I. *et al.* (2014) fastGapFill: efficient gap filling in metabolic networks. *Bioinformatics*, **30**,  
368 2529–2531.
- 369 Wang,Z. *et al.* (2011) Gut flora metabolism of phosphatidylcholine promotes cardiovascular  
370 disease. *Nature*, **472**, 57–63.
- 371 Watrous,J. *et al.* (2012) Mass spectral molecular networking of living microbial colonies. *Proc.*  
372 *Natl. Acad. Sci.*, **109**, E1743–E1752.
- 373 Wishart,D.S. *et al.* (2018) HMDB 4.0: the human metabolome database for 2018. *Nucleic Acids*  
374 *Res.*, **46**, D608–D617.
- 375 Yang,Y. *et al.* (2013) New sample preparation approach for mass spectrometry-based profiling  
376 of plasma results in improved coverage of metabolome. *J. Chromatogr. A*, **1300**, 217–226.  
377  
378



379 Figure 1:  
380

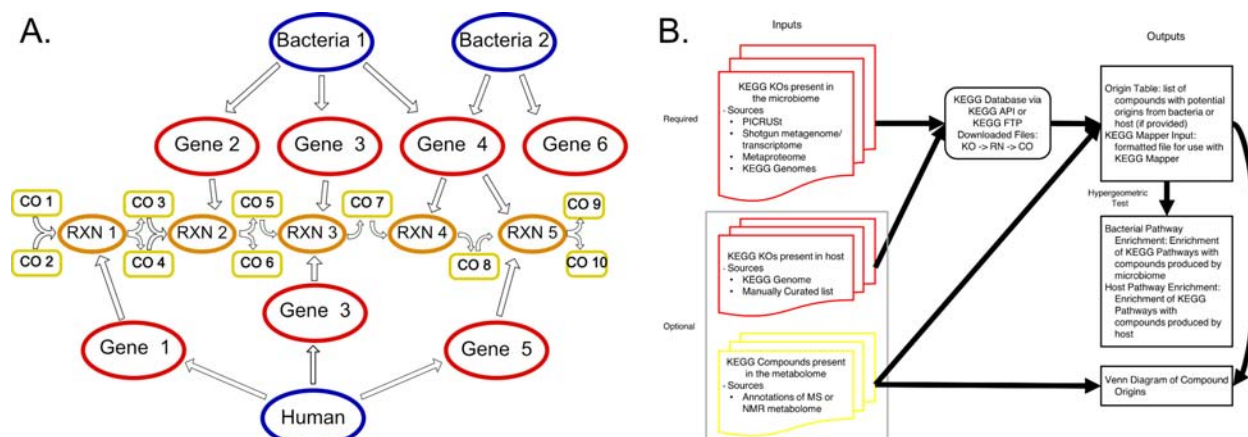

381  
382  
383 Figure 1: The network analysis and data flow of AMON. A) A simple multi-organism metabolic  
384 network. Blue nodes represent genomes, red nodes represent genes, orange nodes represent  
385 reactions and yellow nodes represent compounds. Edges between blue and red nodes indicate  
386 that the bacterial genomes contain the indicated genes and edges between red and orange nodes  
387 indicate the reactions which the genes can mediate. Yellow to orange edges connect reactants to  
388 a reaction and orange to yellow edges connect the reactions to its products. This network can be  
389 traversed to connect products of reactions to the genes and organisms which could produce these  
390 products. B) This schematic shows the flow of data through the AMON tool. The required input  
391 is a list of KEGG orthology (KO) identifiers which will be used with the KEGG database to  
392 build a metabolic network and determine the possible metabolites produced. This information is  
393 output to the user along with a pathway enrichment analysis to show functionality in the  
394 produced metabolite and a KEGG mapper file for visualization of metabolite origin in KEGG  
395 pathways.  
396

397 Figure 2:  
A.

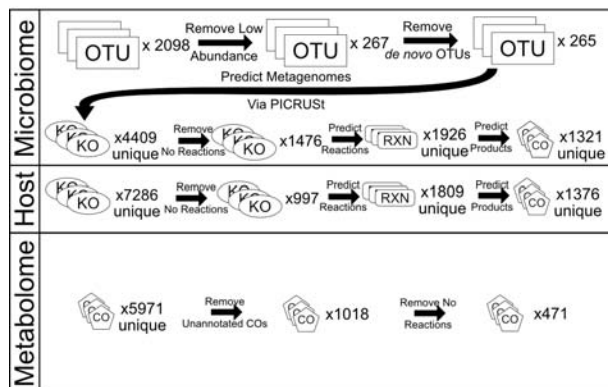

B.

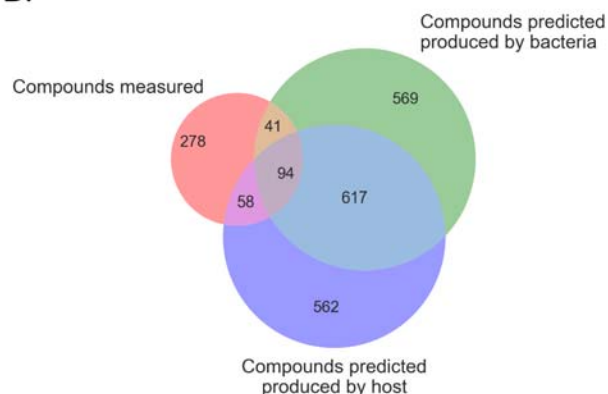

398  
399

400 Figure 2: The results of a case study running AMON with 16S rRNA sequencing data from stool  
401 and PICRUST to predict the metagenome along with the KEGG human genome and an LC/MS  
402 untargeted metabolome. A) A flow diagram showing how much data is lost between parts of  
403 analyses at all data levels. B) A Venn diagram showing overlaps in compound sets. The red  
404 circle shows compounds detected with untargeted LC/MS with an annotated KEGG compound  
405 ID. The green and purple circles show compounds that the metabolic network tells us could have  
406 been produced by the bacteria present in the microbiome and the host respectively.

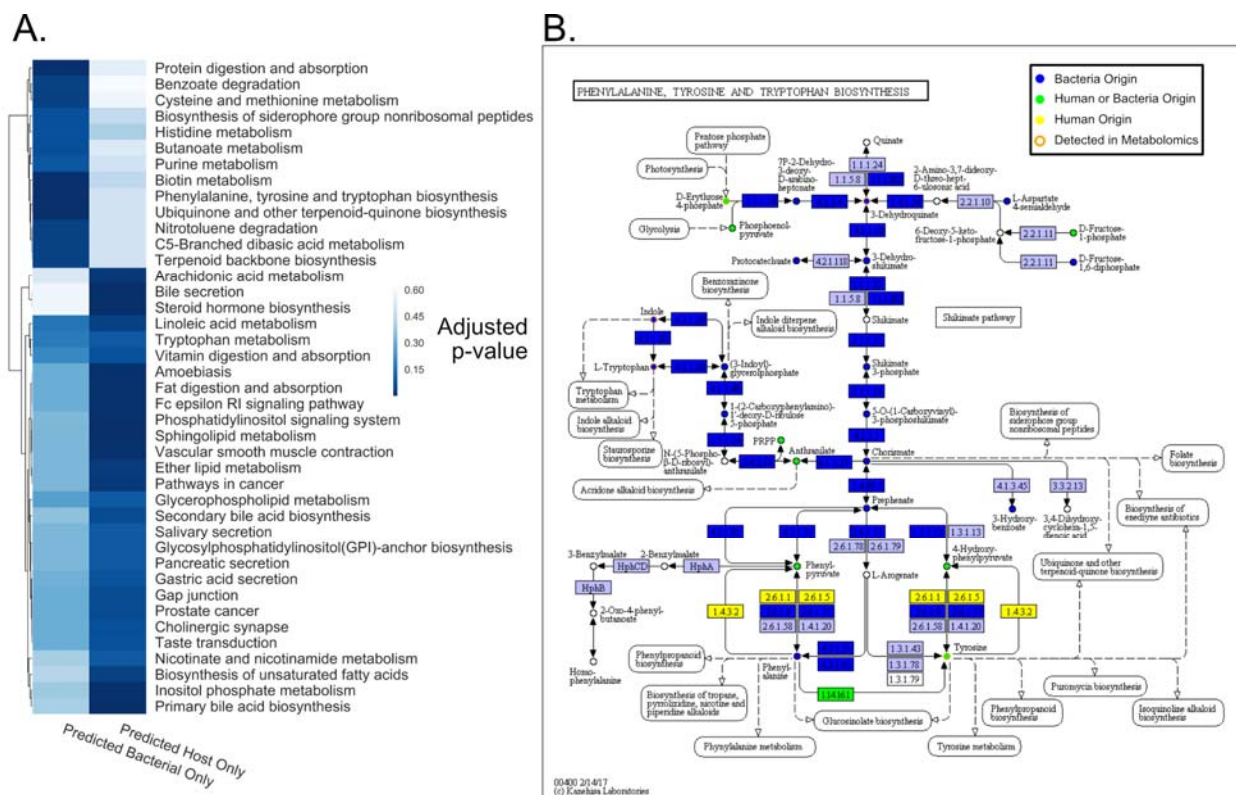

407  
 408 Figure 3: Enrichment of pathways and a single enriched pathway colored with metabolite origin.  
 409 A) A heatmap showing the p-values associated with a pathway enrichment analysis with KEGG  
 410 pathways. The first column is p-values for enrichment of KEGG pathways in compounds that  
 411 were detected via untargeted LC/MS of plasma and we predict could be generated by members  
 412 of the fecal microbiome. The second column is the same but for compounds that we predicted  
 413 could have been generated by the human host. B) This pathway map is colored by putative origin  
 414 of the compound, which are circles, and presence of the reaction, which are rectangles. Dark blue  
 415 is a compound or gene with a bacterial origin, yellow is a compound or gene with a human  
 416 origin, orange outlined compounds are detected in the metabolomics. Circles or rectangles could  
 417 be of human or bacterial origin.
